# Leisure Time Physical Activity Is Associated With Poor Glycemic Control in Type 1 Diabetic Women

## The FinnDiane study

JOHAN WADÉN, MD<sup>1</sup>  
HEIKKI TIKKANEN, MD, DMSC<sup>1,2</sup>  
CAROL FORSBLOM, MD, DMSC<sup>1</sup>  
JOHAN FAGERUDD, MD, DMSC<sup>1</sup>  
KIM PETTERSSON-FERNHOLM, MD, DMSC<sup>1</sup>

TIMO LAKKA, MD, DMSC<sup>3</sup>  
MIKAEL RISKÄ, MD<sup>1</sup>  
PER-HENRIK GROOP, MD, DMSC<sup>1</sup>  
ON BEHALF OF THE FINNDIANE STUDY  
GROUP

**OBJECTIVE** — We studied the association between leisure time physical activity (LTPA) and glycemic control, insulin dose, and estimated glucose disposal rate (eGDR) in type 1 diabetes.

**RESEARCH DESIGN AND METHODS** — This is a cross-sectional study of 1,030 type 1 diabetic patients participating in the Finnish Diabetic Nephropathy Study, a nationwide multicenter study. LTPA was assessed by a validated 12-month questionnaire and expressed in metabolic equivalent (MET) units. Patients were grouped as sedentary (LTPA <10 MET h/week,  $n = 247$ ), moderately active (LTPA 10–40 MET h/week,  $n = 568$ ), and active (LTPA >40 MET h/week,  $n = 215$ ). Outcome measures were HbA<sub>1c</sub>, insulin dose, and eGDR (estimate of insulin sensitivity based on waist-to-hip ratio, hypertension, and HbA<sub>1c</sub>).

**RESULTS** — LTPA correlated with HbA<sub>1c</sub> in women ( $r = -0.12$ ,  $P = 0.007$ ) but not in men ( $r = -0.03$ ,  $P = 0.592$ ). Sedentary women had higher HbA<sub>1c</sub> than moderately active and active women:  $8.8 \pm 1.4\%$  vs.  $8.3 \pm 1.4\%$  vs.  $8.3 \pm 1.4\%$  ( $P = 0.004$ ), whereas HbA<sub>1c</sub> in men was  $8.4 \pm 1.3\%$  vs.  $8.2 \pm 1.4\%$  vs.  $8.2 \pm 1.3\%$  ( $P = 0.774$ ), respectively. In men, insulin doses were  $0.74 \pm 0.21$  vs.  $0.71 \pm 0.20$  vs.  $0.68 \pm 0.23$  IU · kg<sup>-1</sup> · 24 h<sup>-1</sup> ( $P = 0.003$ ). In both sexes, sedentary patients had lower eGDRs than active patients [median (interquartile range) 5.5 (4.0–8.2) vs. 6.8 (4.7–8.8) vs. 6.7 (4.6–8.6) mg · kg<sup>-1</sup> · min<sup>-1</sup>;  $P < 0.01$  for sedentary vs. others]. Age, obesity, smoking, insulin dose, social class, diabetic nephropathy, or cardiovascular disease did not explain the results.

**CONCLUSIONS** — Low levels of LTPA were associated with poor glycemic control in type 1 diabetic women. Men seem to use less insulin when physically active. Increased LTPA levels were associated with increased estimated insulin sensitivity. Longitudinal studies are needed to further clarify the effects of LTPA on type 1 diabetes.

*Diabetes Care* 28:777–782, 2005

From the <sup>1</sup>Folkhälsan Institute of Genetics, Folkhälsan Research Center, Department of Medicine, Division of Nephrology, Helsinki University Central Hospital, University of Helsinki, Helsinki, Finland; the <sup>2</sup>Department of Sports and Exercise Medicine, University of Helsinki, Helsinki, Finland; and the <sup>3</sup>Pennington Biomedical Research Center, Baton Rouge, Louisiana.

Address correspondence and reprint requests to Per-Henrik Groop, Folkhälsan Research Center, Biomedicum Helsinki, Haartmaninkatu 8, P.O. Box 63, 00014 Helsinki, Finland. E-mail: per-henrik.groop@helsinki.fi.

Received for publication 22 June 2004 and accepted in revised form 14 December 2004.

**Abbreviations:** eGDR, estimated glucose disposal rate; LTPA, leisure time physical activity; MET, metabolic equivalent; UAER, urinary albumin excretion rate.

A table elsewhere in this issue shows conventional and Système International (SI) units and conversion factors for many substances.

© 2005 by the American Diabetes Association.

The costs of publication of this article were defrayed in part by the payment of page charges. This article must therefore be hereby marked “advertisement” in accordance with 18 U.S.C. Section 1734 solely to indicate this fact.

Several recent studies have emphasized the importance of physical activity in the prevention of type 2 diabetes (1–4). These studies have shown that progression from the state of impaired glucose tolerance to overt diabetes can be inhibited, or at least postponed, by changing dietary habits and/or increasing the amount of physical activity. In a meta-analysis of 14 studies, exercise resulted in a clinically significant reduction in postintervention HbA<sub>1c</sub> in type 2 diabetic patients (5). Type 1 diabetic patients present features of peripheral insulin resistance that can be improved by increasing physical activity (6–8), rendering a theoretical basis for exercise to also improve glycemic control in type 1 diabetic patients.

One recent cross-sectional study (9) and several intervention studies in the 1980s (6,7,10–17) failed to show any significant improvements in glycemic control by physical activity in type 1 diabetic patients. Only a few studies have shown a positive effect on glycemic control (18–21). Available studies were, however, limited by small numbers of patients or semiquantitative assessments of physical activity. Therefore, our aim was to investigate the association between leisure time physical activity (LTPA) and glycemic control, insulin dose, and estimated insulin sensitivity in a large cohort of adult type 1 diabetic patients by quantifying physical activity with a detailed and validated questionnaire.

## RESEARCH DESIGN AND METHODS

This is a cross-sectional study involving all type 1 diabetic patients participating in the multicenter, nationwide Finnish Diabetic Nephropathy (FinnDiane) study who completed a validated 12-month questionnaire regarding LTPA. All patients had type 1 diabetes, which was defined as diagnosis of diabetes before 35 years of age, permanent insulin treatment started within 1 year of

diagnosis, and serum C-peptide concentrations  $<0.20$  nmol/l. Patients with end-stage renal disease (hemodialysis or renal transplant) were excluded from the study. A total of 1,030 patients (male/female: 482/548) who both fulfilled these criteria and had available data on physical activity were available in the FinnDiane database at the time of the analyses in March 2004. Of these patients, 624 had normal urinary albumin excretion rate (UAER) and were free from cardiovascular complications (myocardial infarction, coronary artery bypass, limb amputation, peripheral artery bypass, or stroke); these patients are later referred to as patients without complications. Normal UAER was defined as  $<20$   $\mu\text{g}/\text{min}$  (overnight collection) or  $<30$   $\text{mg}/24\text{h}$  in at least two of three consecutive urine collections.

The study protocol was approved by the local ethical committees of the participating centers, and the study was carried out in accordance with the Declaration of Helsinki. Written informed consent was obtained from each patient.

LTPA was assessed by a previously validated questionnaire from the Kuopio Ischemic Heart Disease Risk Factor Study (22,23), a modification of the Minnesota leisure time activity questionnaire (24) adapted to Finnish conditions based on the Mini-Finland survey (25). Validation was performed in 1,163 Finnish men from the general population (median age, 54 years) with maximum oxygen uptake ( $\text{VO}_{2\text{max}}$ ) as the standard method of validation; 12-month LTPA correlated with  $\text{VO}_{2\text{max}}$  ( $r = 0.275$ ) (22). The questionnaire has previously been used in epidemiological studies (26,27). LTPA, including indoor and outdoor activities, was calculated based on the 21 most common Finnish forms of physical activity (walking, hiking, skiing, running, swimming, etc.). Mean frequency, single-session duration, and intensity (graded 0–3) of LTPA were assessed for the preceding 12 months. For each intensity grade, activity-specific metabolic equivalent (MET) values were used according to the standard procedure for the questionnaire. MET is a widely used unit in exercise research and is defined as the ratio of metabolic rate during activity to the rate at rest (1 MET corresponds to an energy expenditure of  $1 \text{ kcal} \cdot \text{kg}^{-1} \cdot \text{h}^{-1}$ ). Total amount of LTPA per week was calculated by multiplying time spent on the activities by the intensity index expressed in MET.

Patients were grouped as sedentary ( $<10$  MET h/week), moderately active (10–40 MET h/week), and active ( $>40$  MET h/week). The sedentary patient was defined as performing  $<2$  h of moderate-intensity LTPA (10 MET h; e.g., 2 h of walking with an intensity of 5 MET) per week in accordance to prevailing physical activity recommendations (28). Change in physical activity habits during the last 10 years (reported as decreased markedly/slightly, unchanged, or increased markedly/slightly), frequency of activity in adolescence, and participation in competitive sports were also assessed.

Anthropometric data (weight, height, and waist and hip circumferences) and blood pressure were collected by a trained nurse at all referral centers. Data on smoking, medication, and social class (grouped as unskilled/skilled blue collar, upper/lower white collar, farmers, and others) were also collected in the standard FinnDiane questionnaire. Data on cardiovascular complications and retinopathy were obtained from the physician based on medical records at each referral center. Diabetic nephropathy was defined as present or previous evidence of macroalbuminuria (UAER  $>30$   $\text{mg}/24 \text{ h}$  or  $>200$   $\mu\text{g}/\text{min}$  in at least two of three consecutive urine collections).

Estimated glucose disposal rate (eGDR) was calculated by the equation originally developed by Williams et al. (29) for use in type 1 diabetic patients. The equation was modified for use with  $\text{HbA}_{1c}$  instead of  $\text{HbA}_{1c}$  (T. Orchard, M. Walsh, personal communication):  $24.4 - 12.97$  (waist-to-hip ratio)  $- 3.39$  (hypertension)  $- 0.60$  ( $\text{HbA}_{1c}$ ), where hypertension was assigned 0 or 1 based on blood pressure  $\geq 140/90$  and/or antihypertensive medication. This equation gives eGDR as milligrams per kilogram per minute and the estimate correlates well ( $r^2 = 0.57$ ) with values measured with a euglycemic-hyperinsulinemic clamp. The equation was defined in 24 type 1 diabetic patients (male-to-female ratio 12/12) from the Pittsburgh Epidemiology of Diabetes Complications Study, with mean age 35.5 years, BMI  $27 \text{ kg}/\text{m}^2$ ,  $\text{HbA}_{1c}$  9.9%, and unspecified ethnicity (29).

$\text{HbA}_{1c}$  was locally determined at each referral center. Serum C-peptide was measured centrally in our laboratory by radioimmunoassay (Linco Research, St. Charles, MO). UAER was determined in one 24-h or overnight urine collection at a

central laboratory by radioimmunoassay (Pharmacia, Uppsala, Sweden). Earlier UAER values and serum lipid values were also obtained from the referral centers.

Calculations were performed with SPSS 11.0 software (SPSS, Chicago, IL). For normally distributed variables, parametric tests (ANCOVA, ANOVA) were used. Otherwise, nonparametric tests (Kruskal-Wallis) or logarithmic transformations were used. For categorical variables, a  $\chi^2$  test was used. For between-groups comparisons,  $P$  values for  $\text{HbA}_{1c}$  were adjusted by ANCOVA for age, BMI, and insulin dose, whereas  $P$  values for insulin dose were adjusted for age and BMI.  $P$  values for eGDR were adjusted for age. Correlations for insulin dose were adjusted for age and BMI, whereas correlations for eGDR were adjusted for age. For correlations, two-tailed  $P$  values were given. Values are presented as means  $\pm$  SD or median (interquartile range).  $P < 0.05$  indicated statistical significance.

**RESULTS**— Sedentary patients were more frequently men with greater BMI, decreased serum HDL cholesterol, and a greater prevalence of diabetic nephropathy than patients with greater level of LTPA (Table 1). Sedentary men had larger waist-to-hip ratios than more active men. Age, duration of diabetes, and social class were not associated with levels of LTPA. In men, smoking was clearly associated with LTPA.

Sedentary patients had greater  $\text{HbA}_{1c}$  than moderately active and active patients:  $8.6 \pm 1.3\%$  vs.  $8.3 \pm 1.4\%$  vs.  $8.3 \pm 1.3\%$ , respectively (sedentary vs. moderately active,  $P = 0.009$ ). However, this association between LTPA and  $\text{HbA}_{1c}$  was found only in women (Table 2). Patients with diabetic nephropathy had greater  $\text{HbA}_{1c}$  than patients without nephropathy ( $8.7 \pm 1.3\%$  vs.  $8.3 \pm 1.3\%$ ,  $P = 0.002$ ). Therefore, the association between LTPA and  $\text{HbA}_{1c}$  could be due to less physical activity in patients with diabetic nephropathy. However, virtually the same results regarding LTPA and  $\text{HbA}_{1c}$  were found in the subgroup of patients without complications (Table 2).

There was an inverse correlation between LTPA and  $\text{HbA}_{1c}$  in all women ( $r = -0.12$ ,  $P = 0.007$ ) and in women without complications ( $r = -0.14$ ,  $P = 0.008$ ). In the bottom 50th percentile of LTPA ( $<20.5$  MET h/week), the correlation was stronger in all women ( $r =$

Table 1—Clinical characteristics by level of LTPA

|                                       | Sedentary   | Moderately active | Active       |
|---------------------------------------|-------------|-------------------|--------------|
| Men/women                             | 131/116*    | 246/322           | 105/110†     |
| Age (years)                           | 38 ± 11     | 38 ± 12           | 37 ± 12      |
| Duration of diabetes (years)          | 22 ± 12     | 22 ± 12           | 22 ± 12      |
| BMI (kg/m <sup>2</sup> )              | 25.6 ± 3.5  | 25.1 ± 3.4        | 24.8 ± 3.0†  |
| Waist-to-hip ratio                    |             |                   |              |
| Men                                   | 0.92 ± 0.07 | 0.90 ± 0.06       | 0.91 ± 0.08‡ |
| Women                                 | 0.83 ± 0.07 | 0.82 ± 0.07       | 0.81 ± 0.08  |
| Systolic blood pressure (mmHg)        | 133 ± 17    | 131 ± 16          | 133 ± 18     |
| Diastolic blood pressure (mmHg)       | 79 ± 9      | 78 ± 9            | 79 ± 10      |
| Serum cholesterol (mmol/l)            | 4.9 ± 0.9   | 4.9 ± 0.9         | 4.8 ± 1.0    |
| Serum HDL cholesterol (mmol/l)        | 1.56 ± 0.45 | 1.66 ± 0.42       | 1.69 ± 0.60† |
| Diabetic nephropathy (%)              | 16          | 11                | 10‡          |
| Cardiovascular disease (%)            | 3.3         | 4.8               | 4.3          |
| Retinopathy (%; including background) | 55          | 52                | 50           |
| Current smokers (%)                   |             |                   |              |
| Men                                   | 33          | 18                | 15†          |
| Women                                 | 24          | 20                | 22           |
| White-collar workers (%)              |             |                   |              |
| Men                                   | 30          | 39                | 35           |
| Women                                 | 32          | 45                | 40           |

Data are means ± SD; *n* = 1,030. \**P* = 0.024 men vs. women; †*P* < 0.05 (ANOVA/ $\chi^2$  tests); ‡*P* < 0.05 sedentary vs. others.

−0.20, *P* = 0.001) and in women without complications (*r* = −0.18, *P* = 0.016); in the upper 50th percentile, no correlation was found. No correlation between LTPA and HbA<sub>1c</sub> was found in men (*r* = −0.03, *P* = 0.592). Dissecting LTPA into components of mean intensity, frequency, and single-session duration, women with LTPA of low intensity and frequency had greater HbA<sub>1c</sub> than women with corresponding higher intensity and frequency (Table 3).

Proportions of sedentary versus other patients having poor glycemic control (HbA<sub>1c</sub> > 8.5%) were 55% vs. 39% (*P* = 0.002) in all women and 49% vs. 35% (*P* = 0.031) in women without complications. In men, corresponding proportions were 44% vs. 38% (*P* = 0.238) and 42% vs. 36% (*P* = 0.319), respectively.

The daily dose of insulin correlated with LTPA in all men (*r* = −0.12, *P* = 0.010) and in men without complications (*r* = −0.13, *P* = 0.034). Active men had a lower insulin dose than sedentary men (Table 2). In all women, but not in women without complications, the insulin dose correlated with LTPA: *r* = −0.13 (*P* = 0.034) vs. *r* = −0.10 (*P* = 0.060).

Sedentary vs. moderately active vs. active patients had eGDR [median (interquartile range)] of 5.5 (4.0–8.2) vs. 6.8 (4.7–8.8) vs. 6.7 (4.6–8.6) mg · kg<sup>−1</sup> ·

min<sup>−1</sup> (*P* < 0.01 sedentary vs. moderately active or active) in all patients and 7.1 (4.6–8.5) vs. 7.8 (5.6–9.0) vs. 7.9 (5.9–9.2) mg · kg<sup>−1</sup> · min<sup>−1</sup> (*P* < 0.01 sedentary vs. moderately active or active) in patients

without complications. Correlations between eGDR and LTPA were *r* = 0.10 (*P* = 0.001) in all patients and *r* = 0.12 (*P* = 0.003) in patients without complications. No major sex differences were apparent (Table 2).

In patients without complications, women with previous or present participation vs. nonparticipation in competitive sports had present HbA<sub>1c</sub> of 8.1 ± 1.1% vs. 8.4 ± 1.4% (*P* = 0.020), whereas in men the corresponding values were 8.3 ± 1.5% vs. 8.1 ± 1.2% (*P* = 0.188). Frequency of LTPA in adolescence was not associated with present HbA<sub>1c</sub> (data not shown). The change in LTPA during the last 10 years was also associated with HbA<sub>1c</sub>. Women reporting a decline in LTPA had higher HbA<sub>1c</sub> values than those reporting an increase in LTPA (Fig. 1), a result found statistically significant in all women but not in women without complications. For men, no association between changes in LTPA and HbA<sub>1c</sub> was found (data not shown).

A sedentary level of LTPA, insulin dose (international units per kilogram per 24 h), age, duration of diabetes, BMI, waist-to-hip ratio, systolic blood pressure, diastolic blood pressure, antihypertensive medication, serum cholesterol, serum HDL cholesterol, diabetic ne-

Table 2—HbA<sub>1c</sub>, insulin dose, and insulin sensitivity by level of LTPA

|                                                       | Sedentary      | Moderately active | Active        | <i>P</i> |
|-------------------------------------------------------|----------------|-------------------|---------------|----------|
| All patients ( <i>n</i> = 1,030)                      |                |                   |               |          |
| HbA <sub>1c</sub> (%)                                 |                |                   |               |          |
| Women                                                 | 8.8 ± 1.4*     | 8.3 ± 1.4         | 8.3 ± 1.4     | 0.004    |
| Men                                                   | 8.4 ± 1.3      | 8.2 ± 1.4         | 8.2 ± 1.3     | 0.844    |
| Insulin (IU · kg <sup>−1</sup> · 24 h <sup>−1</sup> ) |                |                   |               |          |
| Women                                                 | 0.71 ± 0.22    | 0.71 ± 0.23†      | 0.66 ± 0.22   | 0.036    |
| Men                                                   | 0.74 ± 0.21†   | 0.71 ± 0.20       | 0.68 ± 0.23   | 0.003    |
| eGDR (mg · kg <sup>−1</sup> · min <sup>−1</sup> )     |                |                   |               |          |
| Women                                                 | 6.8 (4.6–8.7)† | 7.4 (5.3–9.2)     | 7.3 (5.5–9.2) | 0.038    |
| Men                                                   | 4.7 (3.5–7.4)† | 5.4 (3.9–8.1)     | 5.5 (4.0–8.0) | 0.052    |
| Without complications ( <i>n</i> = 624)‡              |                |                   |               |          |
| HbA <sub>1c</sub> (%)                                 |                |                   |               |          |
| Women                                                 | 8.7 ± 1.4*     | 8.2 ± 1.3         | 8.2 ± 1.3     | 0.042    |
| Men                                                   | 8.3 ± 1.3      | 8.1 ± 1.4         | 8.1 ± 1.2     | 0.659    |
| Insulin (IU · kg <sup>−1</sup> · 24 h <sup>−1</sup> ) |                |                   |               |          |
| Women                                                 | 0.72 ± 0.20    | 0.72 ± 0.24       | 0.67 ± 0.20   | 0.229    |
| Men                                                   | 0.76 ± 0.21†   | 0.74 ± 0.23       | 0.69 ± 0.23   | 0.013    |
| eGDR (mg · kg <sup>−1</sup> · min <sup>−1</sup> )     |                |                   |               |          |
| Women                                                 | 8.0 (5.8–9.0)  | 8.3 (6.2–9.4)     | 8.5 (6.5–9.7) | 0.191    |
| Men                                                   | 6.0 (4.1–8.2)  | 7.0 (4.6–8.4)     | 7.6 (5.1–8.5) | 0.090    |

Data are means ± SD or median (interquartile range). \**P* < 0.017 vs. moderately active; †*P* < 0.017 vs. active; ‡excluding patients with elevated UAER, myocardial infarction, coronary artery bypass, limb amputation, peripheral artery bypass, or stroke.

Table 3—HbA<sub>1c</sub> by components of LTPA for patients without complications

| Component      | Women           | Men             |
|----------------|-----------------|-----------------|
| Intensity      |                 |                 |
| Low            | 8.8 ± 1.4* (21) | 8.1 ± 0.9 (21)  |
| Moderate       | 8.1 ± 1.2 (66)  | 8.2 ± 1.4 (43)  |
| High           | 8.4 ± 1.7 (13)  | 8.2 ± 1.5 (36)† |
| P              | 0.012           | 0.724           |
| Frequency      |                 |                 |
| <1 time/week   | 9.0 ± 1.4‡ (16) | 8.3 ± 1.0 (26)  |
| 1–2 times/week | 8.4 ± 1.3 (23)  | 8.3 ± 1.1 (30)  |
| >2 times/week  | 8.2 ± 1.3 (61)  | 8.1 ± 1.7 (44)§ |
| P              | 0.008           | 0.425           |
| Duration       |                 |                 |
| <3 h/week      | 8.5 ± 1.4 (36)  | 8.3 ± 1.3 (42)  |
| 3–6 h/week     | 8.3 ± 1.4 (31)  | 8.1 ± 1.5 (32)  |
| >6 h/week      | 8.1 ± 1.3 (33)  | 8.1 ± 1.2 (26)  |
| P              | 0.156           | 0.173           |

Data are means ± SD (%); n = 624. Percentages represent distribution of corresponding level of component of LTPA within each sex. \*P = 0.001 vs. moderate intensity; †P = 0.001 vs. women with high LTPA intensity; ‡P = 0.002 vs. >2 times/week; §P = 0.001 vs. women with LTPA frequency >2 times/week; ||P = 0.037 vs. women with LTPA duration >6 h/week.

phropathy, cardiovascular disease, laser-treated retinopathy, current smoking, and social class were entered in a logistic regression model with poor glycemic control (HbA<sub>1c</sub> >8.5%) as the dependent variable. In women, a sedentary level of LTPA (odds ratio 2.07 [95% CI 1.18–3.62]), smoking (2.01 [1.11–3.63]) and insulin dose (4.82 [1.31–17.79]) were independently associated with poor glycemic control. In men, low social class was the only independently associated variable (1.91 [1.09–3.36]).

**CONCLUSIONS**—Physical activity is generally recommended as a crucial component in the management of diabe-

tes (30). It has previously been shown that higher physical activity is associated with lower mortality among type 1 diabetic men (31), but there is no convincing evidence that physical activity has a positive effect on glycemic control in type 1 diabetic patients. In this cross-sectional study of 1,030 Finnish type 1 diabetic patients, we showed that low levels of LTPA were associated with poor glycemic control. The association was also evident in patients with normal renal function and without major cardiovascular complications, indicating that the effect of physical activity was not biased by diabetic complications (i.e., that patients highly affected by their disease perform little

physical activity). However, it is of note that the association was found only in women.

In men, on the other hand, we found an association between higher levels of LTPA and lower use of exogenous insulin. This association was less substantial in women because no association was found in women without complications. Therefore, one possible explanation for the observed sex difference in respect to LTPA and HbA<sub>1c</sub> might be a difference in behavior among men and women in adjusting insulin doses in response to physical activity. Men more often reported high-intensity LTPA; women in turn reported more frequent LTPA than men (Table 3). Diabetic men may tend to decrease insulin doses to prevent hypoglycemic periods during or after high-intensity physical activity, thus avoiding hypoglycemic symptoms but at the same time losing any possible positive effect of physical activity on glycemic control. This statement is merely speculative and based on our cross-sectional data but is supported by data on male athletes with type 1 diabetes showing poor glycemic control despite high physical activity (32). In our study, however, no association between HbA<sub>1c</sub> and LTPA in men was found despite adjustment for insulin dose. A possible beneficial effect of physical activity on glycemic control could also be diminished by ingestion of extra carbohydrates in association with exercise (33). Unfortunately, dietary habits were not assessed in our study. We found an association between higher LTPA and higher calculated insulin sensitivity in both sexes, which also may contribute to decreased insulin dosage. It should be noted, however, that an estimation of insulin sensitivity (based on waist-to-hip ratio, hypertension, and HbA<sub>1c</sub>) was used, not a direct measurement. Decreased insulin dose with increased LTPA might also reflect higher noninsulin-mediated glucose uptake in skeletal muscle tissue (34).

The overall effect of LTPA on glycemic control, insulin dose, and estimated insulin sensitivity was not large, as indicated by low linear correlation coefficients. In women, LTPA explained only 1.4% of the total variance in HbA<sub>1c</sub>, supporting previous findings of the minimal effect of physical activity on glycemic control. However, we found that in the lower range of LTPA, sedentary women had higher mean HbA<sub>1c</sub> than more active

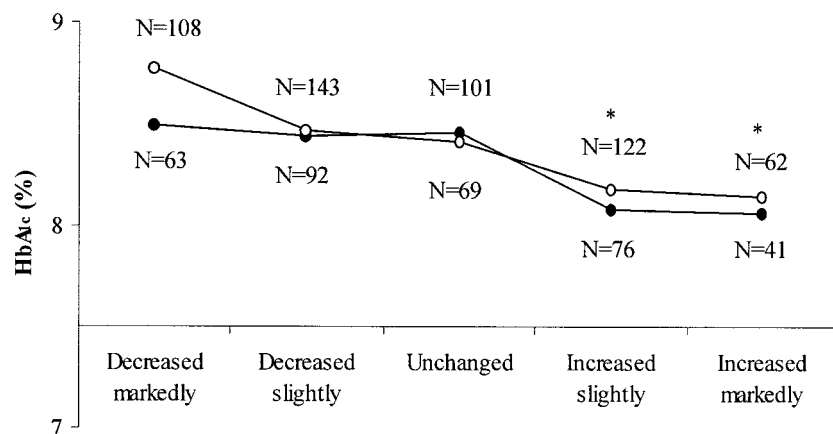

Figure 1—HbA<sub>1c</sub> in women by reported change in LTPA during last 10 years. ○, all women; ●, women without complications. \*P ≤ 0.01 vs. decreased markedly (all women).



women, the difference being clinically relevant regarding development of diabetic complications (35). In LTPA subgroups of intensity and frequency, the differences in HbA<sub>1c</sub> were somewhat more pronounced. A greater proportion of sedentary women also had poor glycemic control compared with nonsedentary women, suggesting that low LTPA may be a risk factor for poor glycemic control. Low LTPA was independently associated with poor glycemic control in a multivariate model. Our data also support that no additional benefit on HbA<sub>1c</sub> is gained by performing high levels of LTPA. Thus, it seems that avoidance of a sedentary lifestyle is the key message instead of a general dose-response approach to LTPA and glycemic control in type 1 diabetes.

The strength of this study is the large number of patients and the use of a detailed, validated, and quantitative physical activity questionnaire. However, the cross-sectional design of the study somewhat limits the interpretation of the results, and further prospective studies are needed. Several confounding variables could have affected the glycemic control. It should be noted that the effect of LTPA on glycemic control in women could not be explained by age, obesity, insulin dose, diabetic nephropathy, cardiovascular disease, social class, or smoking. The LTPA questionnaire has so far not been validated for women. However, in addition to the total MET hours per week score, it should be appreciated that glycemic control was associated with plain variables such as general frequency and intensity of LTPA (asked directly as "how often?" and "how intense?").

There are many potential benefits from LTPA in patients with type 1 diabetes apart from improvement of glycemic control. However, poor glycemic control increases the risk for microvascular complications in type 1 diabetes (35). It seems that LTPA equal to a weekly dose of <2 h of walking might confer greater risk for poor glycemic control, at least in women. Thus, the clinician should encourage both the type 2 diabetic patient and the type 1 diabetic patient to perform regular LTPA according to present recommendations.

**Acknowledgments**—The study was supported by grants from the Folkhälsan Research Foundation, the Samfundet Folkhälsan, the Wilhelm and Else Stockmann Foundation, the

vonFrenckell Foundation, the Liv och Hälsa Foundation, the Perklén Foundation, the Finnish Medical Society (Finska Läkaresällskapet), and the European Commission contract QL62-CT-2001-01669.

We thank Maikki Parkkonen, Tarja Vesisenaho, Sinikka Lindh, and Anna Sandelin for their skilled assistance. We also thank all physicians and nurses at each referral center participating in the collection of patients; the centers have been previously presented in detail (36).

## References

1. DPP Research Group: Reduction in the incidence of type 2 diabetes with lifestyle intervention or metformin. *N Engl J Med* 346:393–403, 2002
2. Tuomilehto J, Lindström J, Eriksson JG, Valle TT, Hämäläinen H, Ilanne-Parikka P, Keinänen-Kiukaanniemi S, Laakso M, Louheranta A, Rastas M, Salminen V, Uusitupa M: Prevention of type 2 diabetes mellitus by changes in lifestyle among subjects with impaired glucose tolerance. *N Engl J Med* 344:1343–1350, 2001
3. Pan XR, Li GW, Hu YH, Wang JX, Yang WY, An ZX, Hu ZX, Lin J, Xiao JZ, Cao HB, Liu PA, Jiang XG, Jiang YY, Wang JP, Zheng H, Zhang H, Bennet PH, Howard BV: Effects of diet and exercise in preventing NIDDM in people with impaired glucose tolerance: the Da Qing IGT and Diabetes Study. *Diabetes Care* 20:537–544, 1997
4. Eriksson KF, Lindgärde F: Prevention of type 2 (non-insulin-dependent) diabetes mellitus by diet and physical exercise: the 6-year Malmö Feasibility Study. *Diabetologia* 34:891–898, 1991
5. Boule NG, Haddad E, Kenny GP, Wells GA, Sigal RJ: Effects of exercise on glycemic control and body mass in type 2 diabetes mellitus: a meta-analysis of controlled clinical trials. *JAMA* 286:1218–1227, 2001
6. Landt KW, Campaigne BW, James FW, Sperling MA: Effects of exercise training on insulin sensitivity in adolescents with type 1 diabetes. *Diabetes Care* 8:461–465, 1985
7. Yki-Järvinen H, DeFronzo R, Koivisto VA: Normalization of insulin sensitivity in type 1 diabetic subjects by physical training during insulin pump therapy. *Diabetes Care* 7:520–527, 1984
8. Arslanian S, Nixon PA, Becker DJ, Drash AL: Impact of physical fitness and glycemic control on in vivo insulin action in adolescents with IDDM. *Diabetes Care* 13:9–15, 1990
9. Ligtnerberg PC, Blans M, Hoekstra JBL, Tweel Ivd, Erkelens DW: No effect of long-term physical activity on the glycemic control in type 1 diabetes patients: a cross-sectional study. *Neth J Med* 55:59–63, 1999
10. Baevre H, Sovik O, Wisnes A, Heiervang E: Metabolic responses to physical training in young insulin-dependent diabetics. *Scand J Clin Lab Invest* 45:109–114, 1985
11. Hansen LP, Jacobsen BB, Kofoed PE, Larsen ML, Tougaard L, Johansen I: Serum fructosamine and HbA<sub>1c</sub> in diabetic children before and after attending a winter camp. *Acta Paediatr Scand* 78:451–452, 1989
12. Huttunen NP, Lankela SL, Knip M, Lahtala P, Kaar ML, Laasonen K, Puukka R: Effect of once-a-week training program on physical fitness and metabolic control in children with IDDM. *Diabetes Care* 12:737–740, 1989
13. Rowland TW, Swadba LA, Biggs DE, Burke EJ, Reiter EO: Glycemic control with physical training in insulin-dependent diabetes mellitus. *Am J Dis Child* 139:307–310, 1985
14. Wallberg-Henriksson H, Gunnarsson R, Henriksson J, Defronzo R, Felig P, Östman J, Wahren J: Increased peripheral insulin sensitivity and muscle mitochondrial enzymes but unchanged blood glucose control in type 1 diabetics after physical training. *Diabetes* 31:1044–1050, 1982
15. Wallberg-Henriksson H, Gunnarsson R, Henriksson J, Ostman J, Wahren J: Influence of physical training on formation of muscle capillaries in type I diabetes. *Diabetes* 33:851–857, 1984
16. Wallberg-Henriksson H, Gunnarsson R, Rossner S, Wahren J: Long-term physical training in female type 1 (insulin-dependent) diabetic patients: absence of significant effect on glycaemic control and lipoprotein levels. *Diabetologia* 29:53–57, 1986
17. Zinman B, Zuniga-Guajardo S, Kelly D: Comparison of the acute and long-term effects of exercise on glucose control in type 1 diabetes. *Diabetes Care* 7:515–519, 1984
18. Dahl-Jorgensen K, Meen HD, Hanssen KF, Aagenaes O: The effect of exercise on diabetic control and hemoglobin A<sub>1c</sub> (HbA<sub>1c</sub>) in children. *Acta Paediatr Scand* 283 (Suppl):53–56, 1980
19. Campaigne BN, Gilliam TB, Spencer ML, Lampman RM, Schork MA: Effects of a physical activity program on metabolic control and cardiovascular fitness in children with insulin-dependent diabetes mellitus. *Diabetes Care* 7:57–62, 1984
20. Peterson CM, Jones RL, Esterly JA, Wantz GE, Jackson RL: Changes in basement membrane thickening and pulse volume concomitant with improved glucose control and exercise in patients with insulin-dependent diabetes mellitus. *Diabetes Care* 3:586–589, 1980

21. Bak JF, Jacobsen UK, Jorgensen FS, Pedersen O: Insulin receptor function and glycogen synthase activity in skeletal muscle biopsies from patients with insulin-dependent diabetes mellitus: effects of physical training. *J Clin Endocrinol Metab* 69:158–164, 1989
22. Salonen JT, Lakka TA: Assessment of physical activity in population studies—validity and consistency of the methods in the Kuopio Ischemic Heart Disease Risk Factor Study. *Scand J Sports Sci* 9:89–95, 1987
23. Lakka TA, Salonen JT: Intra-person variability of various physical activity assessments in the Kuopio Ischaemic Heart Disease Risk Factor Study. *Int J Epidemiol* 21:467–472, 1992
24. Taylor HL, Jacobs DR, Shucker B, Knudsen J, Leon AS, DeBacker G: A questionnaire for the assessment of leisure-time physical activities. *J Chronic Dis* 31:741–755, 1978
25. Mätkiä E, Impivaara O, Maatela J, Aromaa A, Heliovaara M, Knekt P: *Physical Activity of Finnish Adults (ML 80)*. Turku, Finland, Social Insurance Institute, 1988
26. Lakka TA, Salonen JT: Physical activity and serum lipids: a cross-sectional population study in eastern Finnish men. *Am J Epidemiol* 136:806–818, 1992
27. Lakka TA, Venäläinen JM, Rauramaa R, Salonen R, Tuomilehto J, Salonen JT: Relation of leisure-time physical activity and cardiorespiratory fitness to the risk of acute myocardial infarction. *N Engl J Med* 330:1549–1554, 1994
28. Centers for Disease Control and Prevention: *Physical Activity and Health: A Report of the Surgeon General*. Washington, DC, U.S. Govt. Printing Office, 1996
29. Williams KV, Erbey JR, Becker D, Arslanian S, Orchard TJ: Can clinical factors estimate insulin resistance in type 1 diabetes? *Diabetes* 49:626–632, 2000
30. American Diabetes Association: Physical activity/exercise and diabetes mellitus (Position Statement). *Diabetes Care* 26: S73–S77, 2003
31. Moy CS, Songer TJ, LaPorte RE, Dorman JS, Kriska AM, Orchard TJ, Becker DJ, Drash AL: Insulin-dependent diabetes mellitus, physical activity and death. *Am J Epidemiol* 137:74–81, 1993
32. Ebeling P, Tuominen JA, Bourey R, Koranyi L, Koivisto VA: Athletes with IDDM exhibit impaired metabolic control and increased lipid utilization with no increase in insulin sensitivity. *Diabetes* 44: 471–477, 1995
33. McKewen MW, Rehner NJ, Cox C, Mann J: Glycemic control, muscle glycogen and exercise performance in IDDM athletes on diets of varying carbohydrate content. *Int J Sports Med* 20:349–353, 1999
34. Ploug T, Galbo H, Richter EA: Increased muscle glucose uptake during contractions: no need for insulin. *Am J Physiol* 247:E726–E731, 1984
35. The Diabetes Control and Complications Trial Research Group: The effect of intensive treatment of diabetes on the development and progression of long-term complications in insulin-dependent diabetes mellitus. *N Engl J Med* 14:977–986, 1993
36. Rönnback M, Fagerudd J, Forsblom C, Pettersson-Fernholm K, Reunanen A, Groop PH: Altered age-related blood pressure pattern in type 1 diabetes. *Circulation* 110:1076–1082, 2004
